# Supplementary material for: Real-Time Amperometric Recording of Extracellular H2O2 in the Brain of Immunocompromised Mice: An In Vitro, Ex Vivo and In Vivo Characterisation Study
Source: Sensors (Basel). 2017 Jul 8;17(7):1596. doi: 10.3390/s17071596 (PMC5539478; doi:10.3390/s17071596)
Supplement: Supplementary file 1 [file sensors-17-01596-s001.pdf]

# Supplementary Materials: Real-Time Amperometric Recording of Extracellular H<sub>2</sub>O<sub>2</sub> in the Brain of Immunocompromised Mice: An In Vitro, Ex Vivo and In Vivo Characterisation Study

Caroline H. Reid and Niall J. Finnerty \*

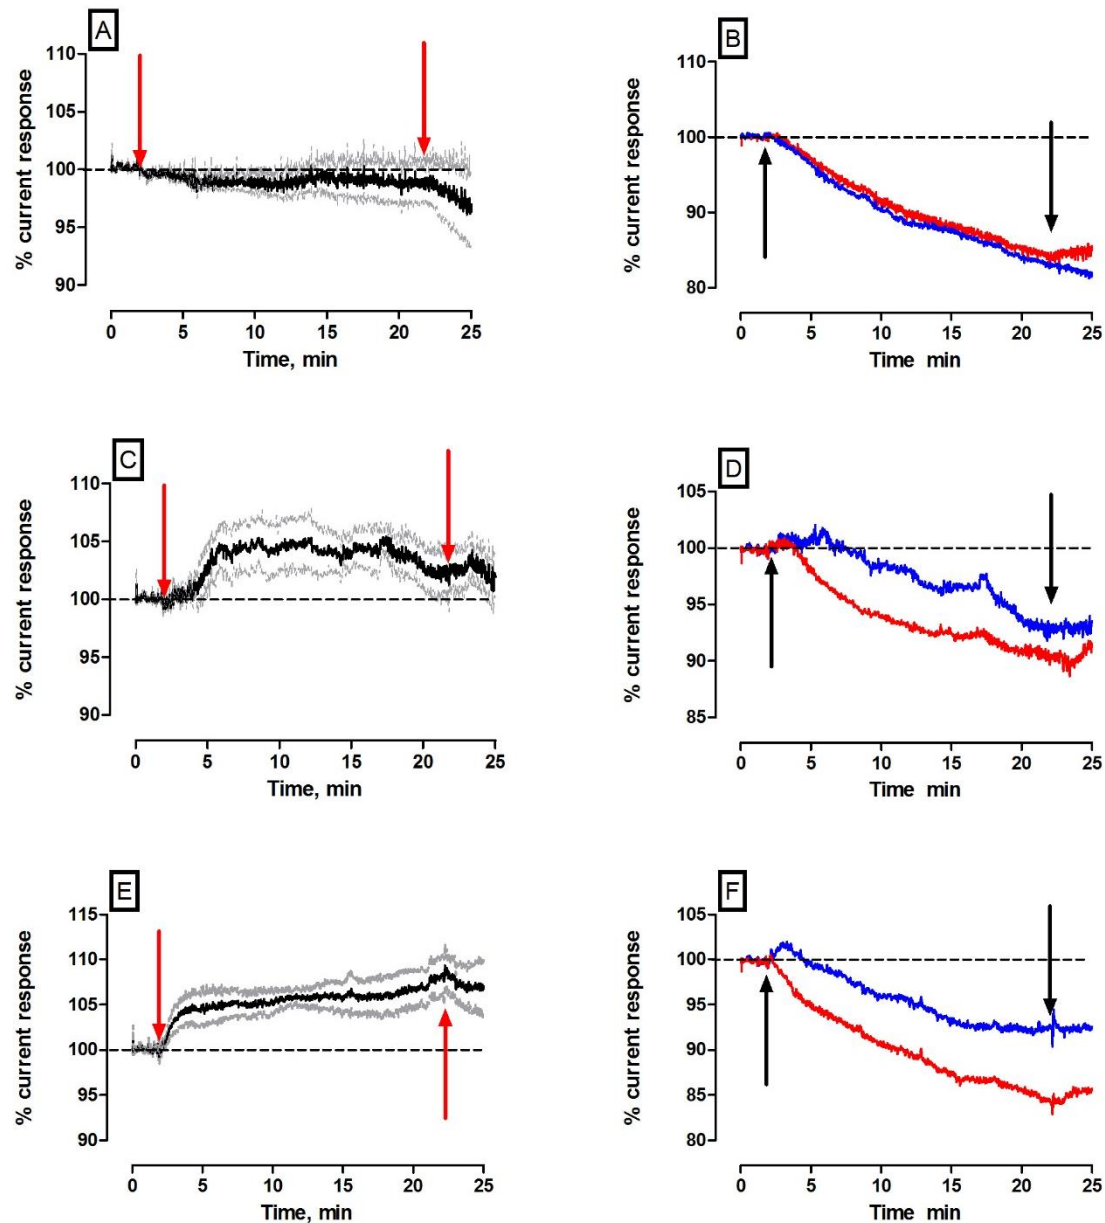

**Figure S1.** Averaged raw data % current response of H<sub>2</sub>O<sub>2</sub> sensors co-implanted with microdialysis probe following 20 min aCSF perfusion (**A** – subtracted H<sub>2</sub>O<sub>2</sub> trace, **B** – H<sub>2</sub>O<sub>2</sub> blank electrode (blue trace) & catalase electrode (red trace)), 20 min 100  $\mu$ M H<sub>2</sub>O<sub>2</sub>/aCSF perfusion (**C** – subtracted H<sub>2</sub>O<sub>2</sub> trace, **D** – H<sub>2</sub>O<sub>2</sub> blank electrode (blue trace) & catalase electrode (red trace)) and 20 min 500  $\mu$ M H<sub>2</sub>O<sub>2</sub>/aCSF perfusion (**E** – subtracted H<sub>2</sub>O<sub>2</sub> trace, **F** – H<sub>2</sub>O<sub>2</sub> blank electrode (blue trace) & catalase electrode (red trace)) in the striatum of anaesthetised NOD SCID mice ( $n = 4$ ). Arrows indicate start/end of perfusion. **A**, **C**, **E** – mean % current response represented by black trace, % error represented by grey trace. **B**, **D**, **F** – mean % current responses-for clarity % errors have been excluded from these traces.

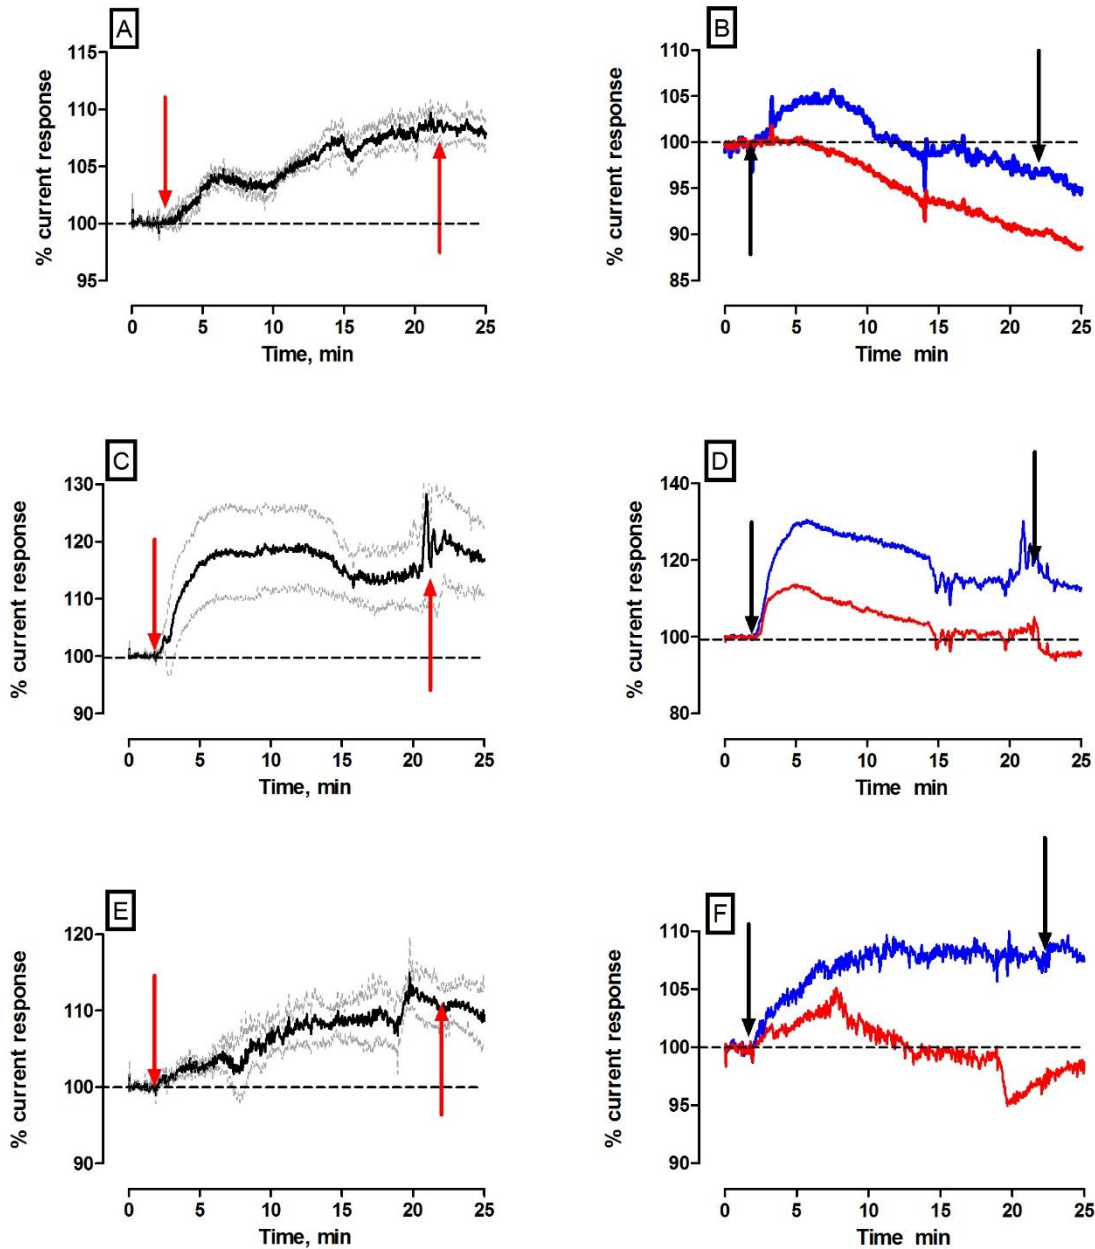

**Figure S2.** Averaged raw data % current response of H<sub>2</sub>O<sub>2</sub> sensors co-implanted with microdialysis probe following 20 min 1 mM H<sub>2</sub>O<sub>2</sub>/aCSF perfusion (A – subtracted H<sub>2</sub>O<sub>2</sub> trace, B – H<sub>2</sub>O<sub>2</sub> blank electrode (blue trace) & catalase electrode (red trace)), 20 min 10 mM H<sub>2</sub>O<sub>2</sub>/aCSF perfusion (C – subtracted H<sub>2</sub>O<sub>2</sub> trace, D – H<sub>2</sub>O<sub>2</sub> blank electrode (blue trace) & catalase electrode (red trace)) ( $n = 4$ ) and 20 min 1 mM MSA/aCSF perfusion (left – subtracted H<sub>2</sub>O<sub>2</sub> trace, right – H<sub>2</sub>O<sub>2</sub> blank electrode (blue trace) & catalase electrode (red trace)) ( $n = 3$ ). Arrows indicate start/end of perfusion. A, C, E – mean % current response represented by black trace, % error represented by grey trace. B, D, F – mean % current responses-for clarity % errors have been excluded from these traces.

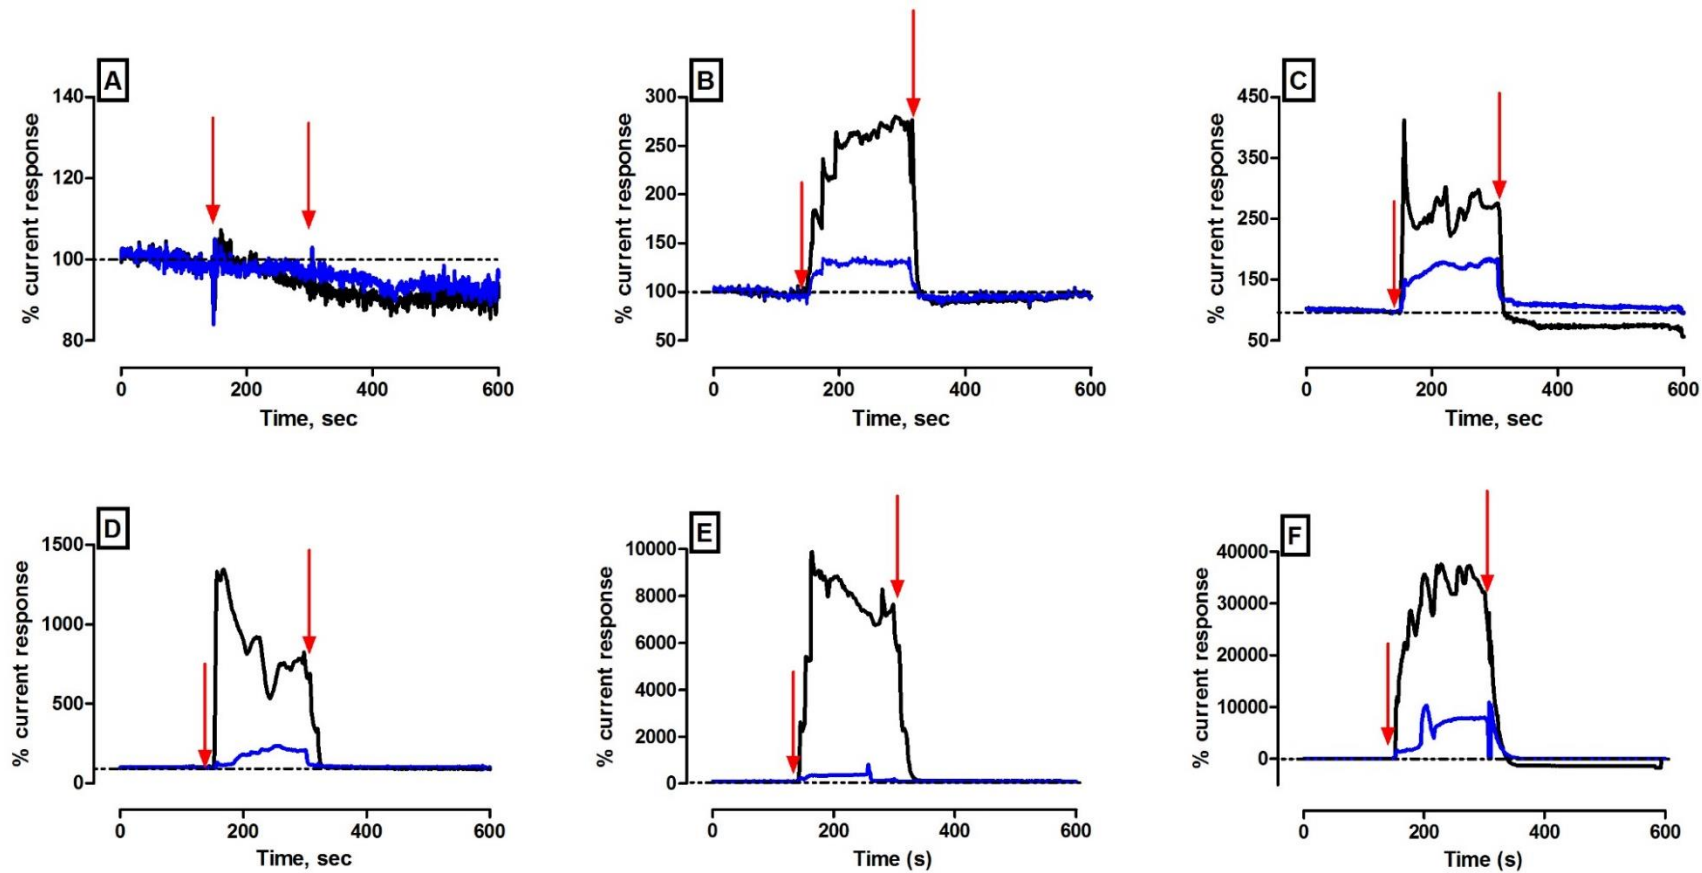

**Figure S3.** Averaged raw data % current response of H<sub>2</sub>O<sub>2</sub> sensors co-implanted with microinfusion probe following 150 s aCSF perfusion (A – H<sub>2</sub>O<sub>2</sub> blank electrode (black trace) & catalase electrode (blue trace)), 150 s 20  $\mu$ M H<sub>2</sub>O<sub>2</sub>/aCSF perfusion (B – H<sub>2</sub>O<sub>2</sub> blank electrode (black trace) & catalase electrode (blue trace)), 150 s 50  $\mu$ M H<sub>2</sub>O<sub>2</sub>/aCSF perfusion (C – H<sub>2</sub>O<sub>2</sub> blank electrode (black trace) & catalase electrode (blue trace)), 150 s 100  $\mu$ M H<sub>2</sub>O<sub>2</sub>/aCSF perfusion (D – H<sub>2</sub>O<sub>2</sub> blank electrode (black trace) & catalase electrode (blue trace)), 150 s 1 mM H<sub>2</sub>O<sub>2</sub>/aCSF perfusion (E – H<sub>2</sub>O<sub>2</sub> blank electrode (black trace) & catalase electrode (blue trace)), 150 s 10 mM H<sub>2</sub>O<sub>2</sub>/aCSF perfusion (F – H<sub>2</sub>O<sub>2</sub> blank electrode (black trace) & catalase electrode (blue trace)) in the striatum of anaesthetised NOD SCID mice ( $n = 4$ ). Arrows indicate start/end of infusion. Data presented as mean % current response-for clarity % errors have been excluded from these traces.

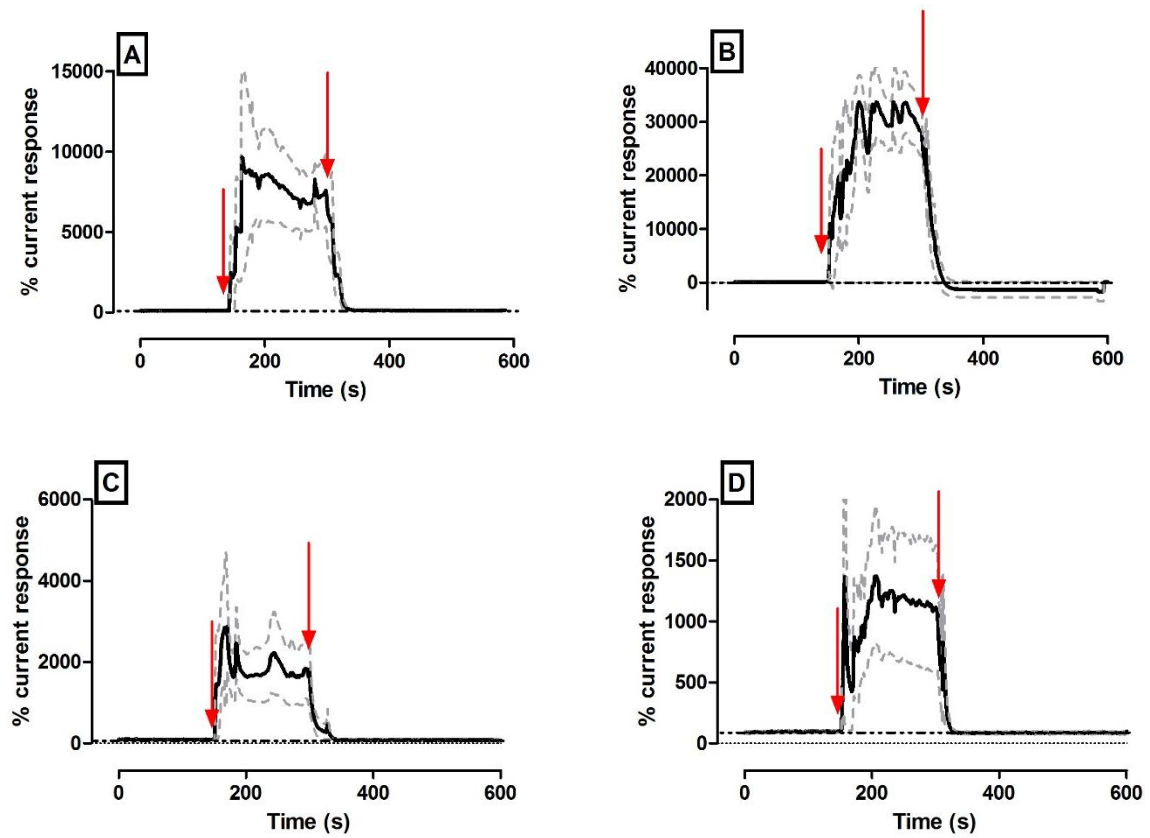

**Figure S4.** Averaged raw data % current response of subtracted  $H_2O_2$  biosensor co-implanted with microinfusion probe following 150 s infusion of (A) 1 mM  $H_2O_2$ /aCSF (B) 10 mM  $H_2O_2$ /aCSF (C) 1 mM SA and (D) 1 mM MSA. Arrows indicate start/end of infusion. Mean % current response represented by black trace, % error represented by grey trace.

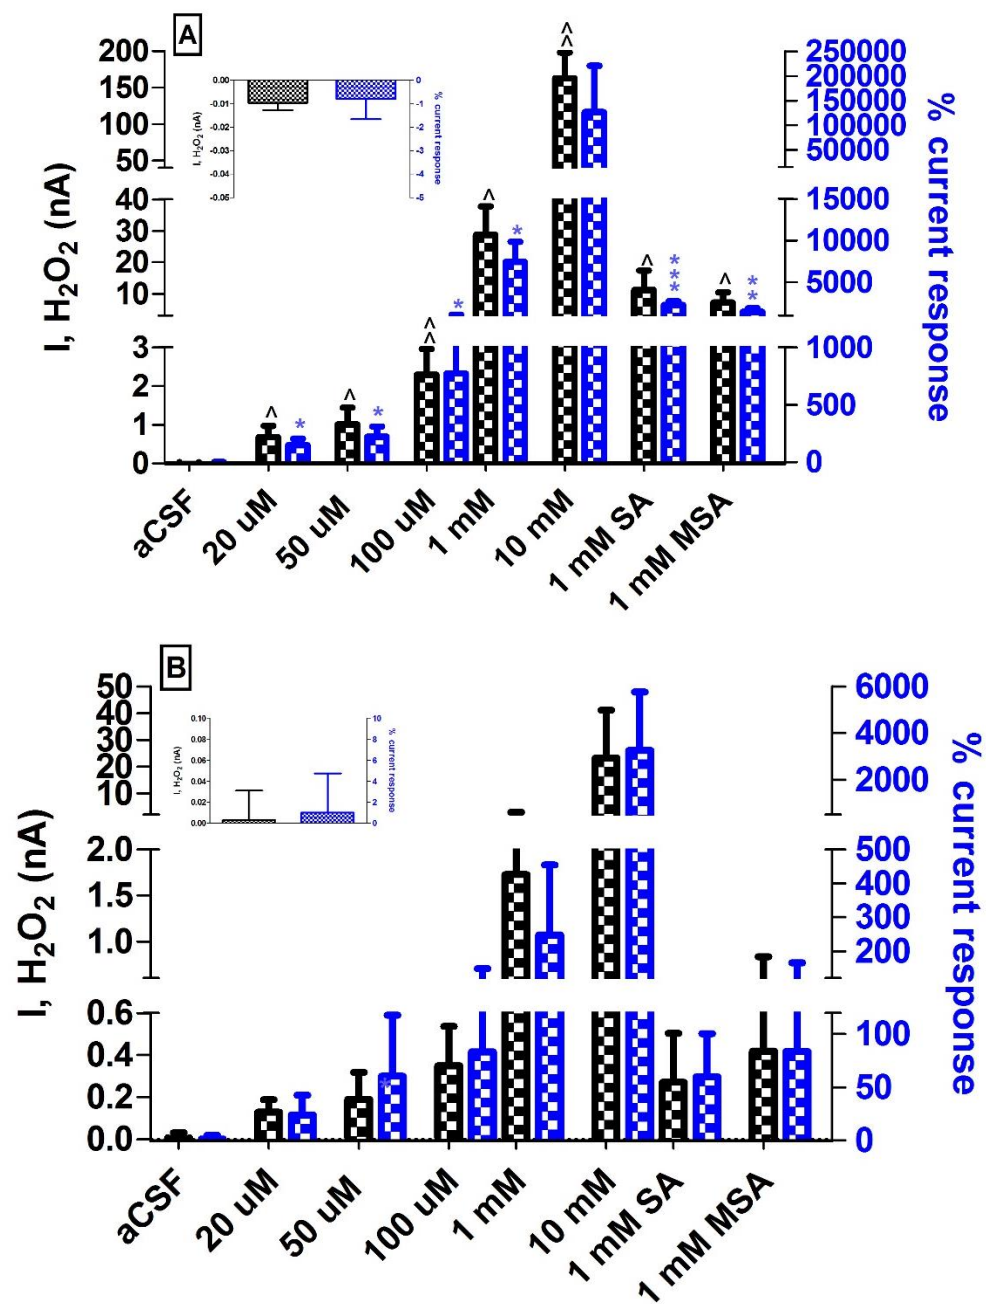

**Figure S5.** Dose effect of infusion of 0–10 mM H<sub>2</sub>O<sub>2</sub> / aCSF ( $n = 5$ ), 1 mM SA ( $n = 3$ ) and MSA ( $n = 3$ ) on (A) H<sub>2</sub>O<sub>2</sub> blank electrode current and (B) H<sub>2</sub>O<sub>2</sub> catalase electrode current. Current (left y-axis) and % current response (right y-axis) data represented as mean  $\pm$  SEM. ^ and \* denote level of significance for currents and % currents respectively.

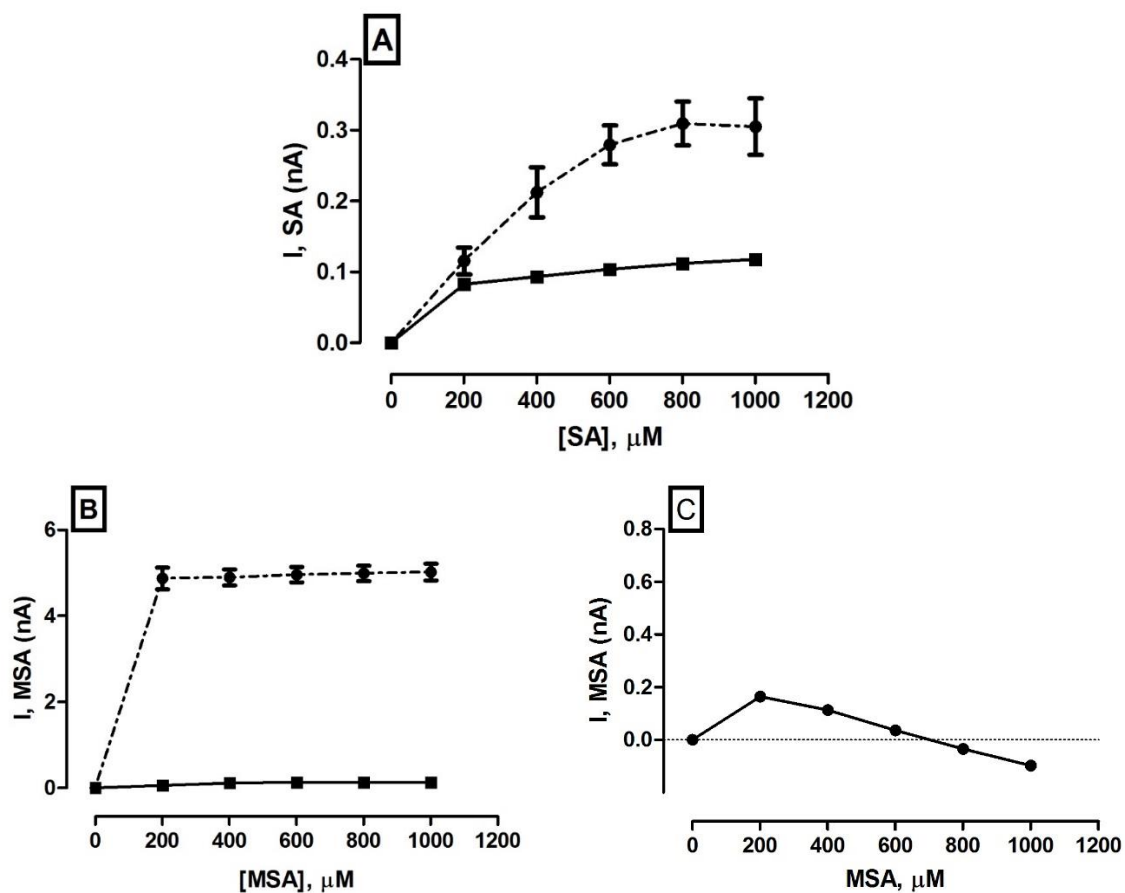

**Figure S6.** Current concentration profiles for (A) 0–1000  $\mu\text{M}$  SA calibration and (B) 0–1000  $\mu\text{M}$  MSA calibrations on unmodified bare Pt electrodes (dashed lines,  $n = 8$ ) and  $\text{H}_2\text{O}_2$  blank electrodes (solid lines,  $n = 8$ ). (C) Effect of 0–10 mM  $\text{H}_2\text{O}_2$  calibration on MSA rejection characteristics of  $\text{H}_2\text{O}_2$  blank electrodes ( $n = 12$ ). All concentration profile data is presented as mean  $\pm$  SEM.
